# Supplementary material
Source: PubMed Central journal article supplement (PMC6398210)

## **Supplemental Information**

# **Integrated Genomic and Proteomic Analyses Revealed Novel Mechanisms of SETD2 in Tumor Development**

Lin Li<sup>1</sup>, Weili Miao<sup>1</sup>, Ming Huang<sup>2</sup>, Preston Williams<sup>1</sup> and Yinsheng Wang<sup>1,2,\*</sup>

<sup>1</sup>Department of Chemistry, University of California, Riverside, CA 92521, USA

<sup>2</sup>Environmental Toxicology Graduate Program, University of California, Riverside, CA 92521,  
USA

\*Corresponding Author: Yinsheng Wang, Tel.: (951) 827-2700; Fax: (951) 827-4713;

E-mail: [Yinsheng.Wang@ucr.edu](mailto:Yinsheng.Wang@ucr.edu)

## Legends for Supplemental Figures

**Supplemental Fig. S1.** Comparison of H3K36me3 and H4K16ac occupancy on chromosomes. A-B, The density of H3K36me3 and H4K16ac ChIP-seq reads across chromosomes 2 (A) and 3 (B) in 293T and SETD2 KO cells.

**Supplemental Fig. S2.** Measurement of creatine content in 293T and SETD2 KO cells. A-D, Shown are the selected-ion chromatograms and corresponding MS/MS for the indicated transitions for creatine and its stable isotope-labeled standard (D<sub>3</sub>-creatine).

**Supplemental Fig. S3.** Real-time quantitative PCR (RT-qPCR) for the confirmation of up-regulated genes in SETD2 KO cells.

**Supplemental Fig. S4.** CRISPR/Cas9-mediated knockout of SETD2 and gene expression levels in SETD2 KO-clone 20.

A, DNA sequencing confirms the deletion in *SETD2* genes generated by CRISPR/Cas9 genome editing method.

B, The levels of H3K36me3 and H4K16ac were decreased in SETD2 KO-clone 20, which is consistent with SETD2 KO-clone 5.

C, The expression levels of many genes were up-regulated in SETD2 KO-clone 20 cells.

**Supplemental Fig. S5.** Comparison of H3K36me3 and H4K16ac levels of differentially expressed genes in SETD2 KO cells. Up-regulated genes are correlated with higher levels of H3K36me3 and H4K16ac occupancy, and vice versa.

A, Average distribution of the H3K36me3 occupancy of up- or down-regulated genes around the TSS and TES.

B, Average distribution of the H4K16ac occupancy of up- or down-regulated genes around the TSS and TES.

**Supplemental Fig. S6-S10.** Representative mass spectra of peptides from several proteins.

Upper panels show the MS of the light and heavy arginine- or lysine-containing peptide.

Bottom panels show the MS/MS of the light or heavy arginine- or lysine-containing peptide. K or R in red indicates heavy labeled lysine or arginine.

**Supplemental Fig. S11.** The interaction network of up-regulated proteins in chromatin fraction of SETD2 KO cells and correlation analysis of proteomic data.

A, The interaction network of up-regulated proteins in the chromatin fraction of SETD2 KO cells. Lines indicate the interaction between proteins. The size and the color of each node are proportional to the interaction protein number of nodes.

B-D, Reproducibility of proteomic quantification were examined by correlation analysis between forward and reverse replicates.

E. Correlation between RNA-seq quantification data and chromatin proteomic data.

**Supplemental Fig. S12.** The mRNA expression levels and the SILAC ratios of several proteins in the chromatin fraction.

A-D, Expression levels of *ANXA2*, *CCNB1*, *CDK1* and *HMGB2* genes in 293T and SETD2 KO cells were confirmed by RT-qPCR.

E, The SILAC ratio of CDK1, CDK2, CCNB1, ANXA2 and HMGB2 in chromatin fraction of 293T and SETD2 KO cells.

**Supplemental Fig. S13.** Proliferation of 293T and SETD2 KO-20 cells after knockdown of *PLK1*, *CCNB1*, *CDK1* or treatment with a PLK1 inhibitor (GSK461364, GSK).

**Supplemental Fig. S14.** Knockdown efficiency of shRNA or siRNA used in this study.

A-C, Knockdown efficiency of shPLK1 (A), shCCNB1 (B) and siCDK1 (C) were confirmed by RT-qPCR.

D, Creatine levels after knockdown of CDK1 in SETD2 KO cells.

E, The relative mRNA expression levels of several oncogenes upon knockdown of *CDK1* gene in SETD2 KO cells.

**Supplemental Fig. S15.** The mRNA expression levels of *PLK1* gene cells derived from ccRCC patients with wild-type or mutated SETD2 gene.

**Supplemental Table S1.** Primers or sequences used in this study.

**Supplemental Table S1. Primers or sequences used in this study.**

| <b>Sequences used for shRNA or siRNA</b>           |                                                                     |
|----------------------------------------------------|---------------------------------------------------------------------|
| Name                                               | Sequence                                                            |
| shPLK1 targeted sequence                           | 5'-CCCGAGGTGCTGAGCAAGAAA-3'                                         |
| shCCNB1 targeted sequence                          | 5'-CTTGAGTTGGAGTACTATATT-3'                                         |
| siCDK1 targeted sequence                           | 5'-ACTTCGTCATCCAAATATA-3'                                           |
| <b>Primers used for real-time quantitative PCR</b> |                                                                     |
| Gene                                               | Sequence                                                            |
| GAPDH                                              | 5'- TTCGACAGTCAGCCGCATCTTCTT -3'<br>5'- CAGGCGCCCAATACGACCAAATC -3' |
| JUN                                                | 5'- CAGGTGGCACAGCTTAAACA -3'<br>5'- AACTGCTGCGTTAGCATGAG -3'        |
| RCN3                                               | 5'- GGGACATCGTGATTGCTGAA -3'<br>5'- CAGATCCGCGATGTACTCCT -3'        |
| CCNB1                                              | 5'- TGCCTATGAAGAAGGAAGCA -3'<br>5'- CTCAGGTTCTGGCTCAGGTT -3'        |
| CDK1                                               | 5'- TGTGGCCAGAAGTGGAATCT -3'<br>5'- TGCCAGAAATTCGTTTGGCT -3'        |
| GAS1                                               | 5'- CCCTCATTCAGCTCAACCAC -3'<br>5'- GTGGACTTGCAGTTCTCGTC -3'        |
| GLI2                                               | 5'- TGGACGTGTCCCGTTTCTC -3'<br>5'- CTGACAGATGCCCGTAGGAA -3'         |
| IRS2                                               | 5'- ACTGCTGCCTGAACATCAAC -3'<br>5'- AGGGCGATCAGGTACTTGTG -3'        |
| PLK1                                               | 5'- GAGGTGCTGAGCAAGAAAGG -3'<br>5'- GGGTTGATGTGCTTGGGAAT -3'        |
| ANXA2                                              | 5'- TGAGCGGGATGCTTTGAAC -3'<br>5'- ATCCTGTCTCTGTGCATTGCTG -3'       |
| HMGB2                                              | 5'- ATGTCCTCGTACGCCTTCTT -3'<br>5'- CATGGTCTTCCATCTCTCCGA -3'       |

# Supplementary Figure S1

**A**

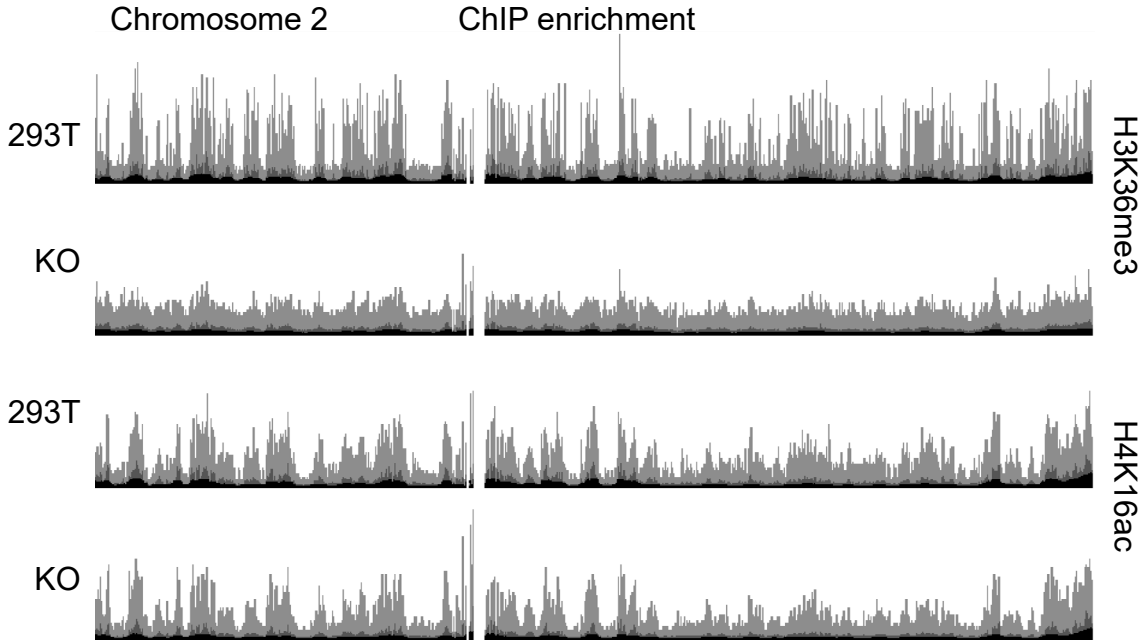

**B**

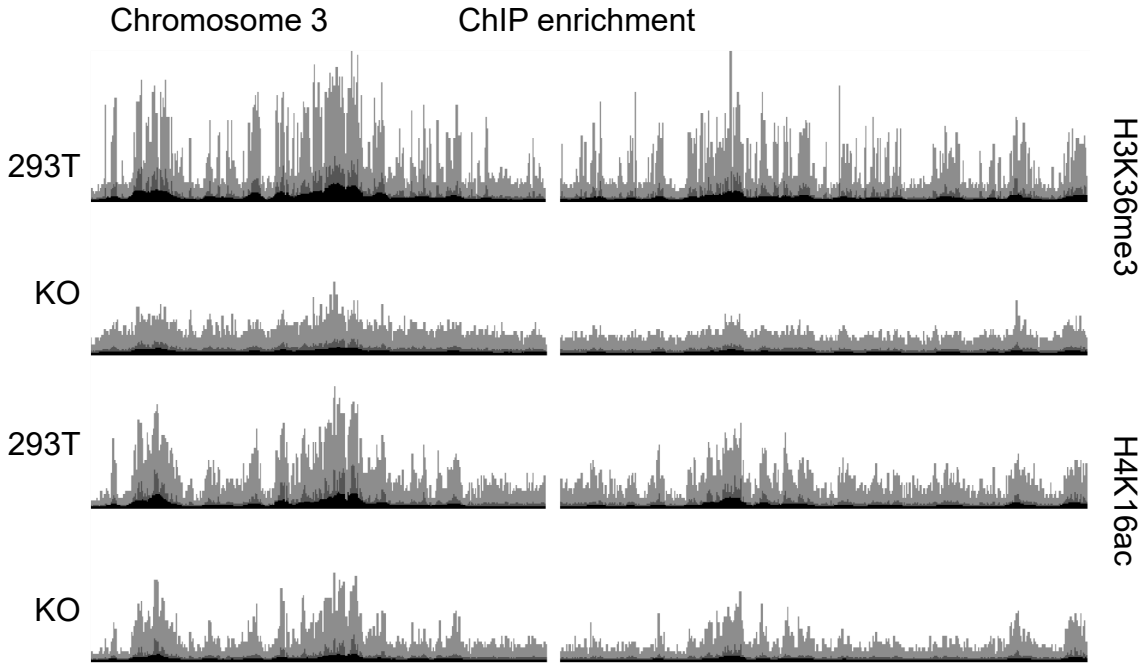

# Supplementary Figure S2

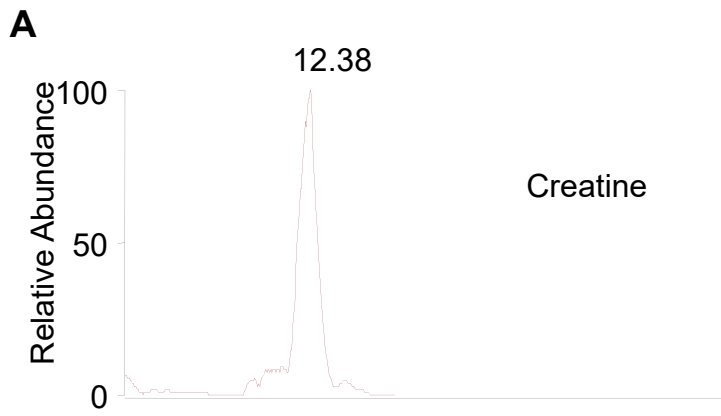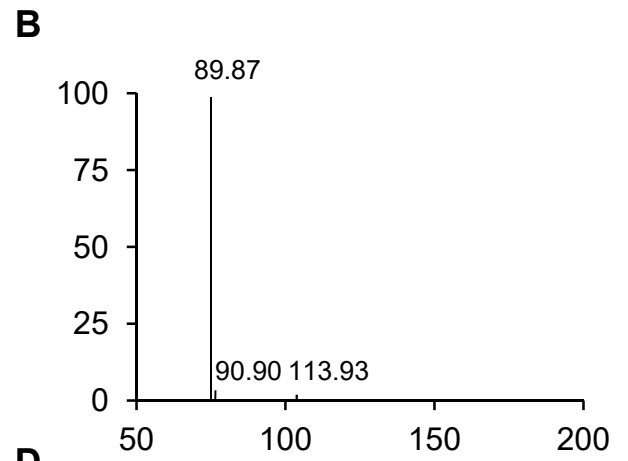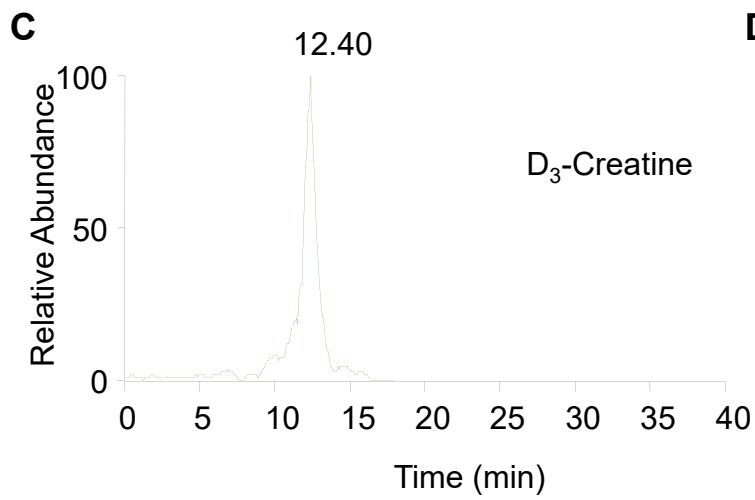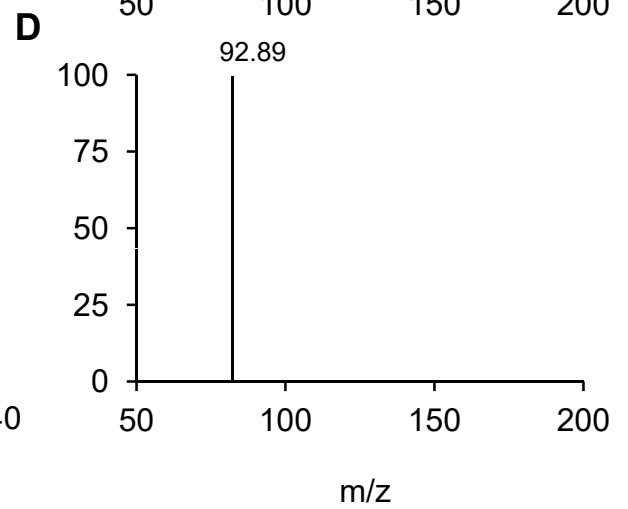

# Supplementary Figure S3

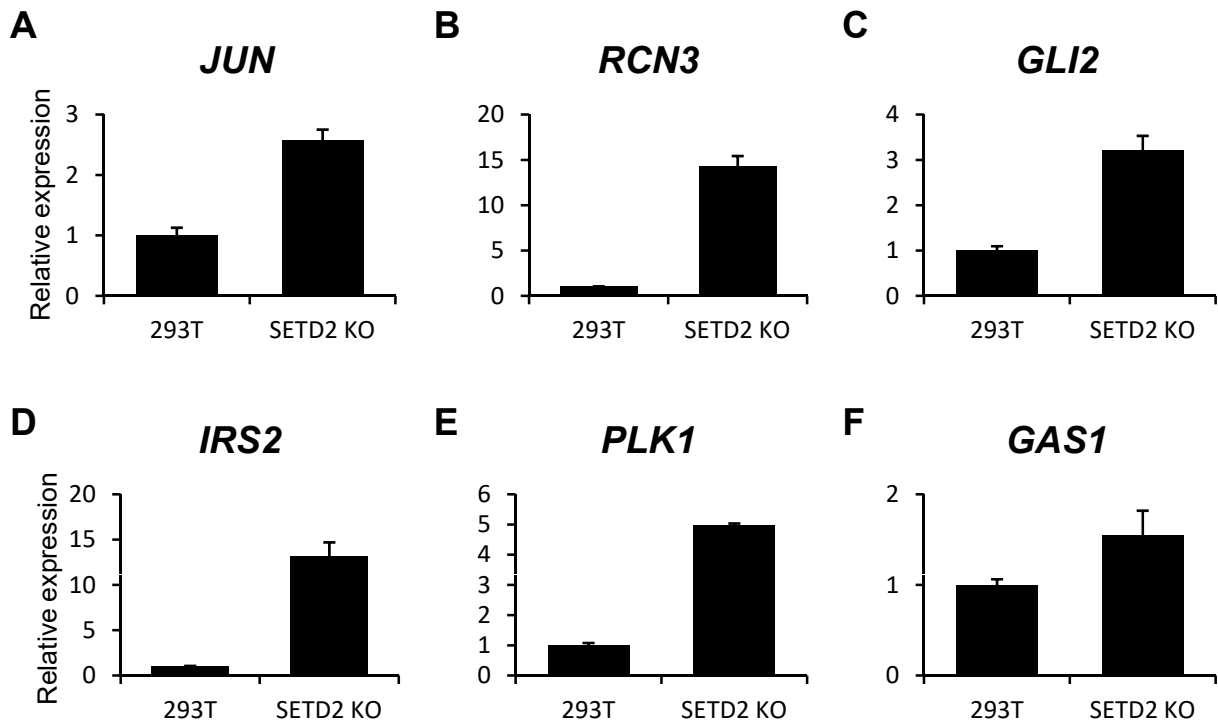

# Supplementary Figure S4

**A**

*SETD2* KO-20

WT ATCTCCTGGGGCAGAATCTGATTTGGCA  
 -8bp ATCT-----AGAATCTGATTTGGCA  
 -13bp ATCT-----CTGATTTGGCA

**B**

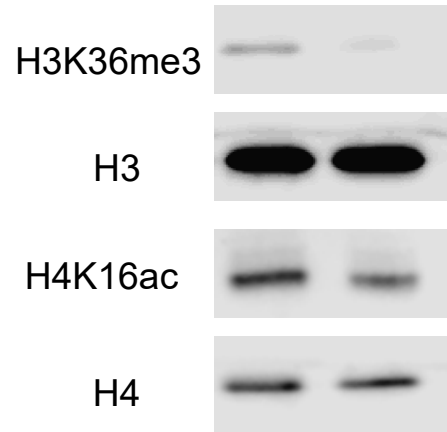

**C**

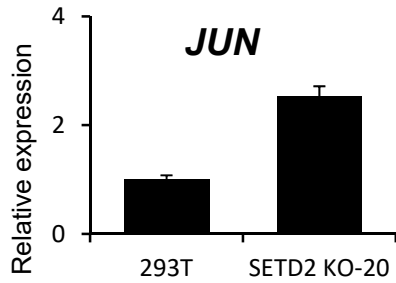

**D**

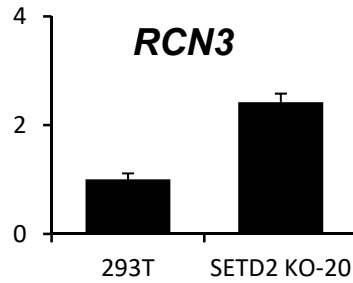

**E**

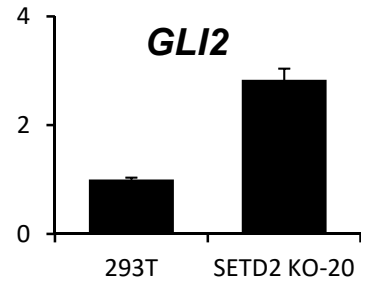

**F**

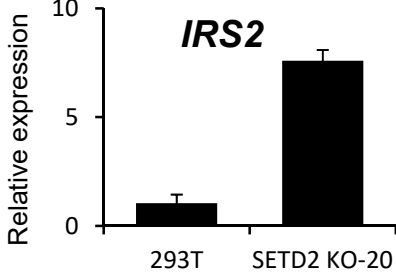

**G**

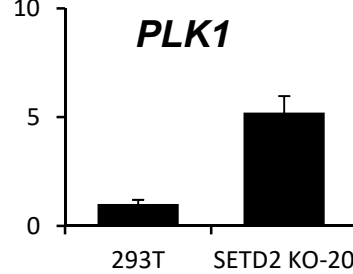

**H**

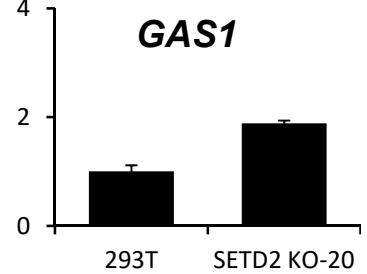



# Supplementary Figure S5

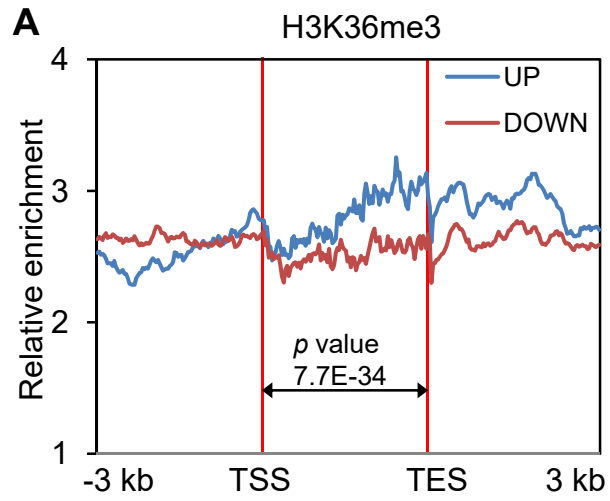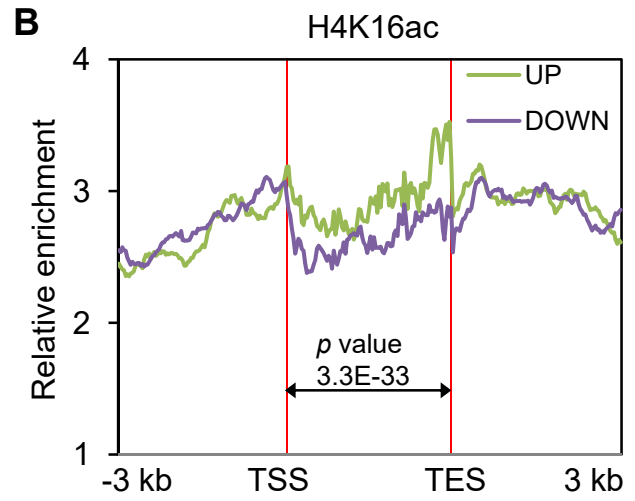

# Supplementary Figure S6

**A**

ANXA2

SALSGHLETVILGLLK

Light  
Heavy

550.9979  
553.6645

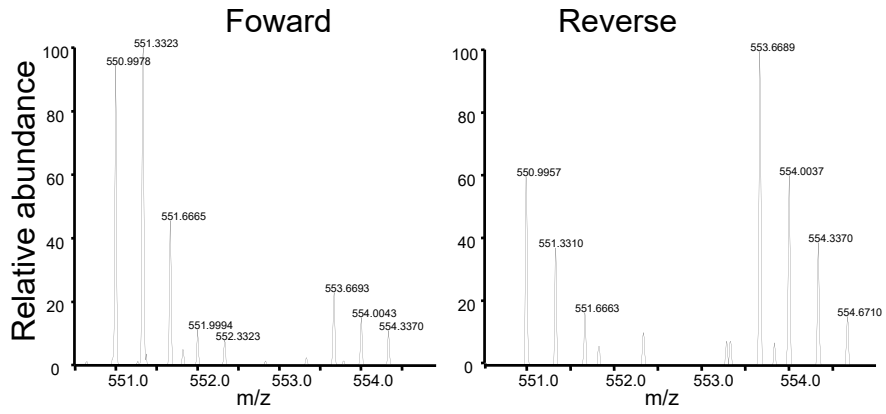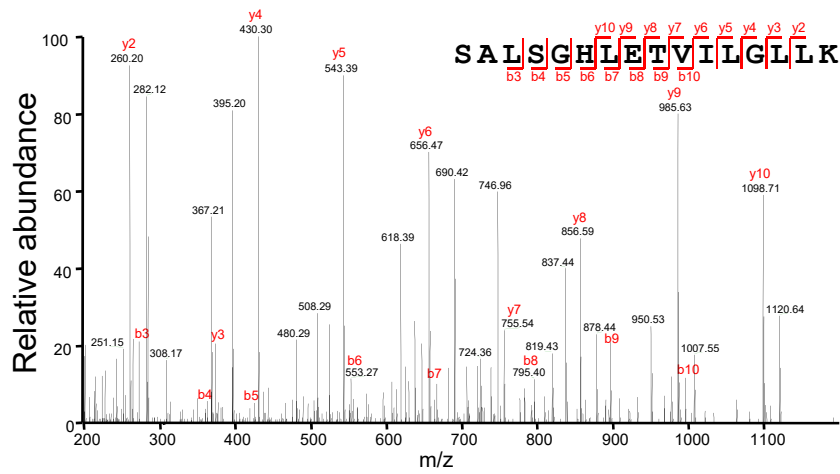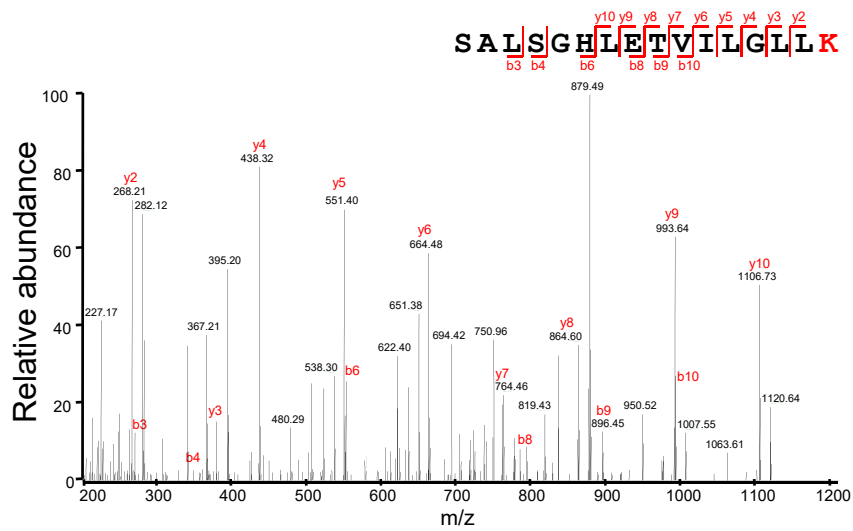

# Supplementary Figure S7

**A**

CCNB1

IGEVDVEQHTLAK

Light  
Heavy

480.2561  
482.9228

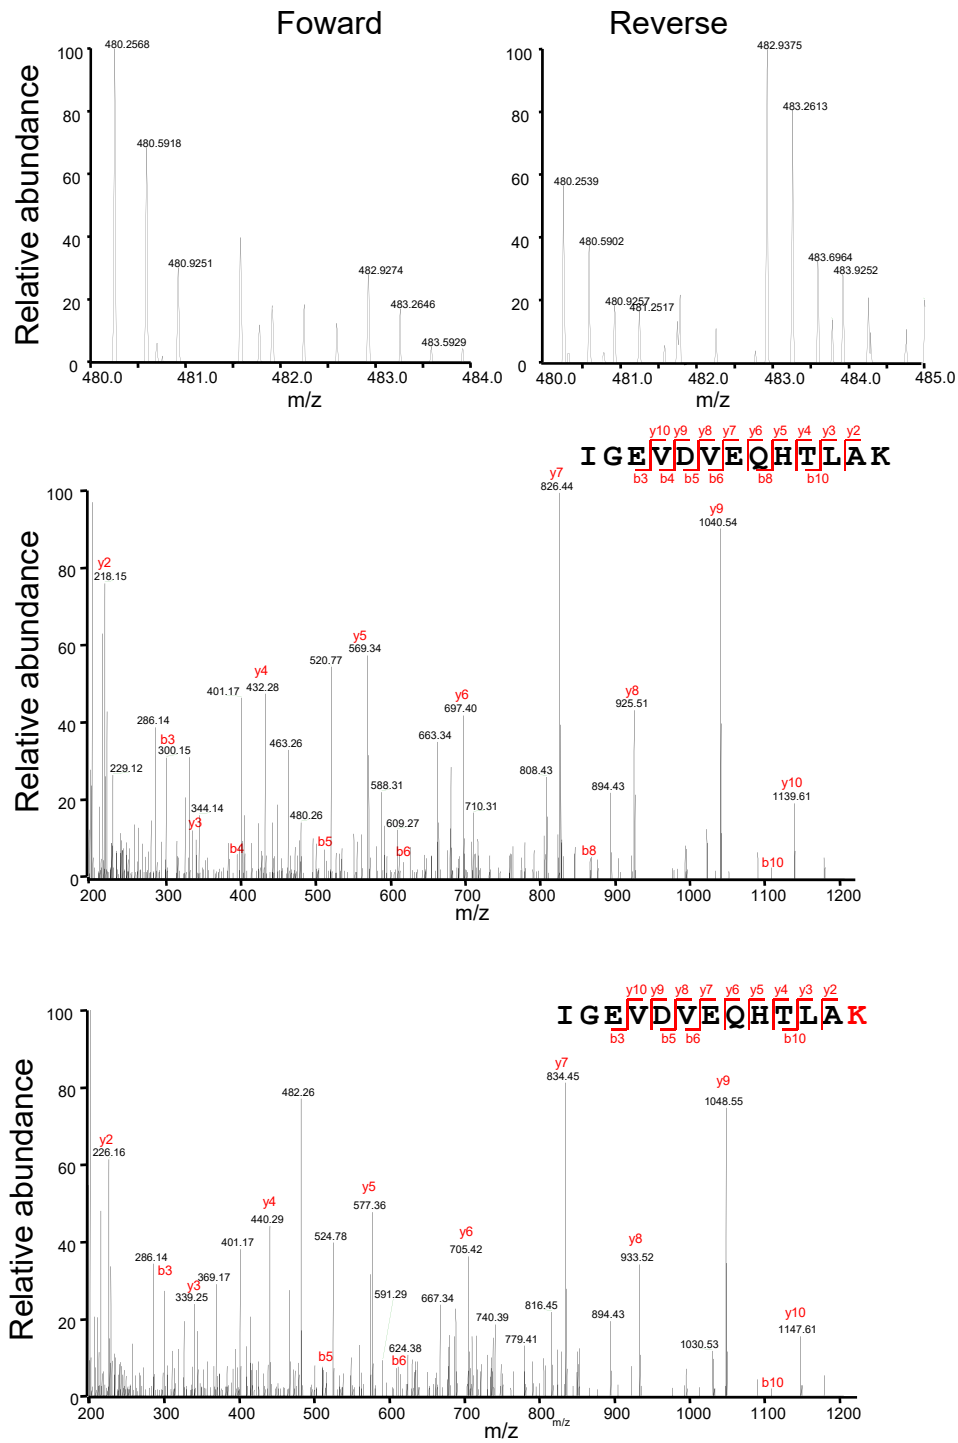

# Supplementary Figure S8

**A**

CDK1

KPLFHGDSEIDQLFR

Light  
Heavy

601.3126

605.9793

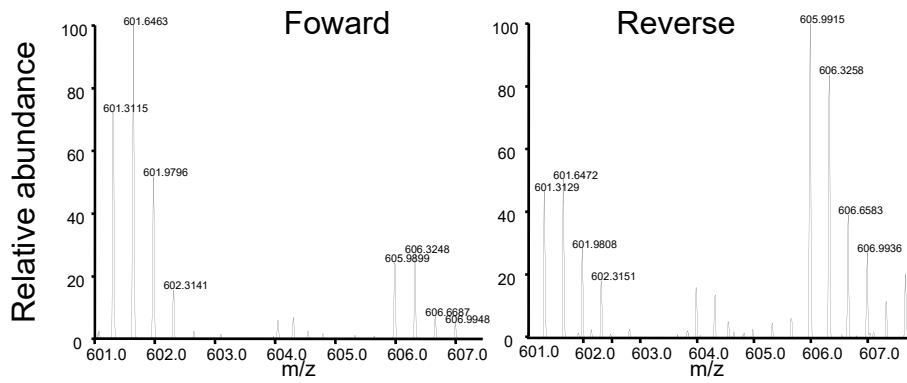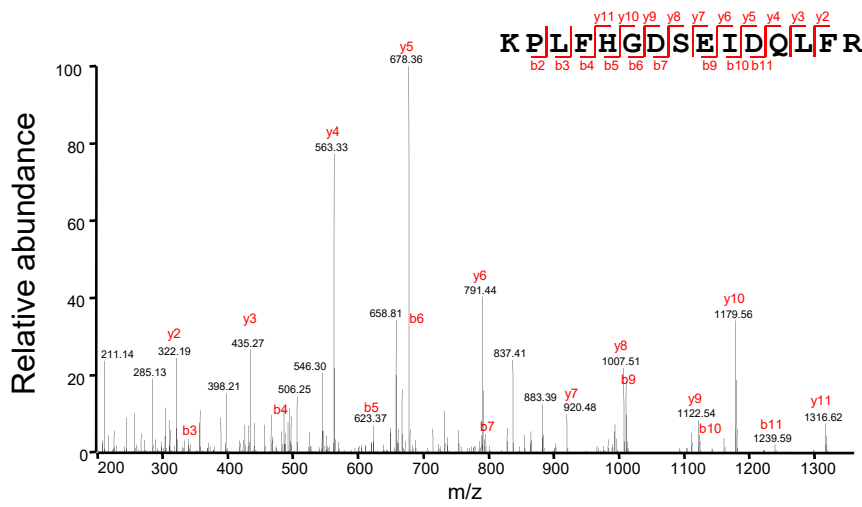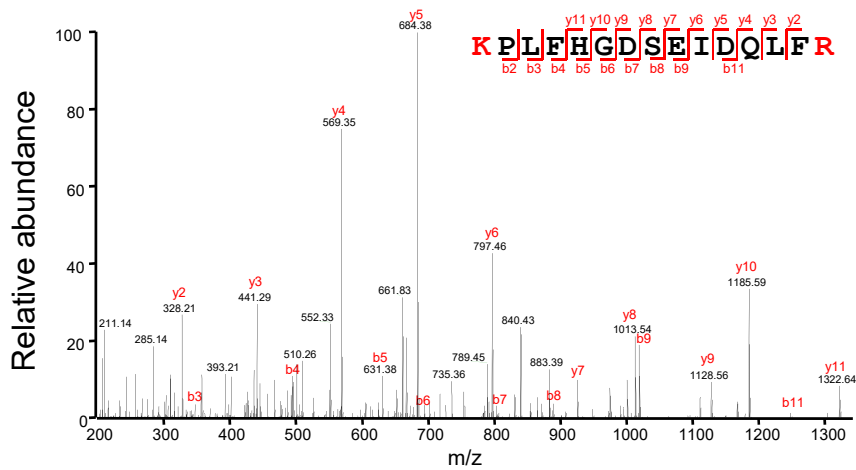

# Supplementary Figure S9

**A**

CDK2

IRLDTETEGVPSTAIR

Light  
Heavy

586.6513

590.6513

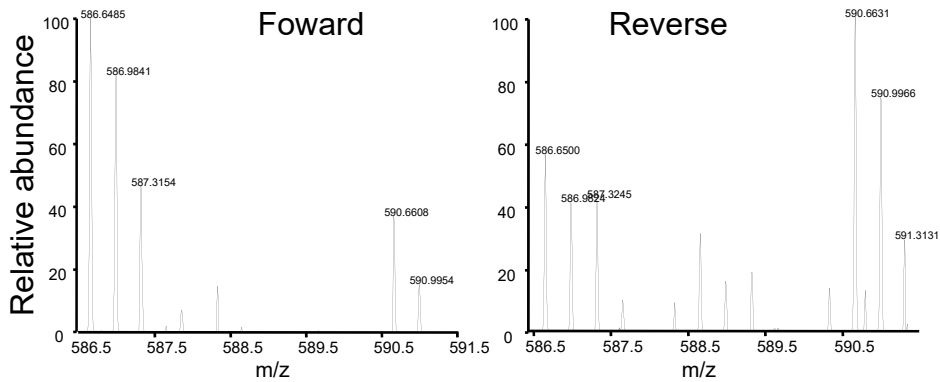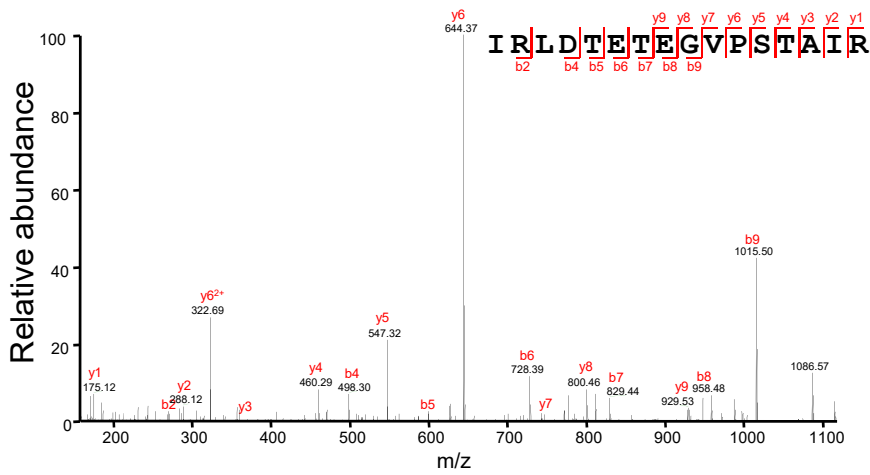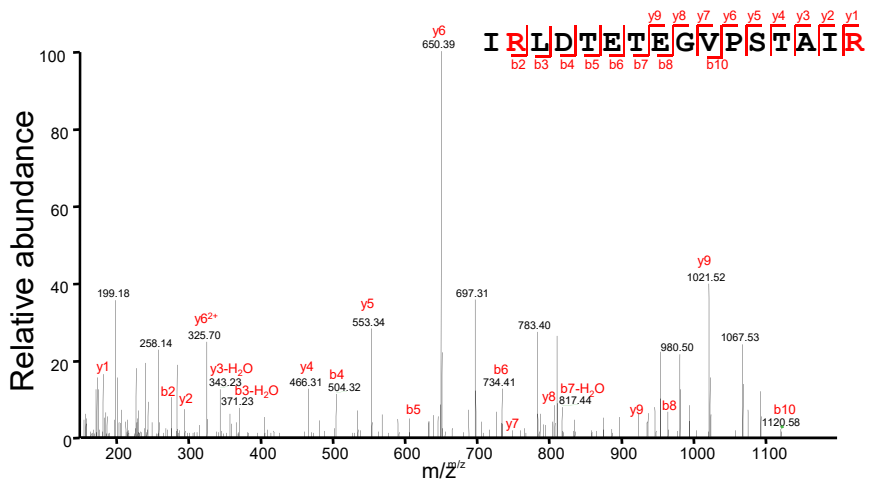

# Supplementary Figure S10

A

HMGB2

IKSEHPGLSIGDTAK

Light  
Heavy

518.2825  
523.6159

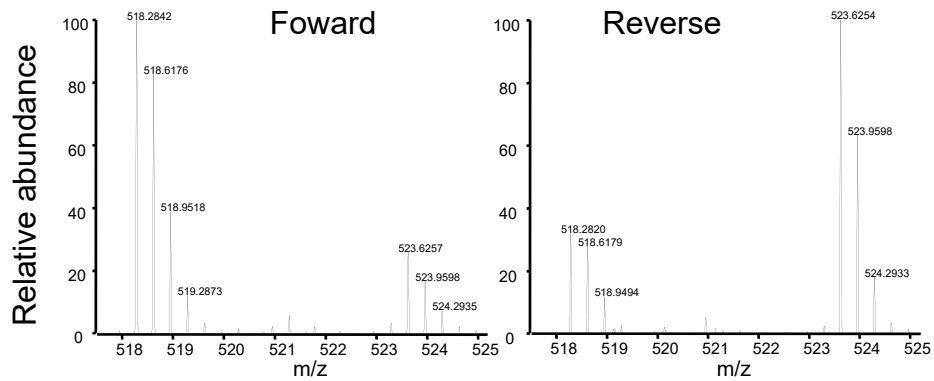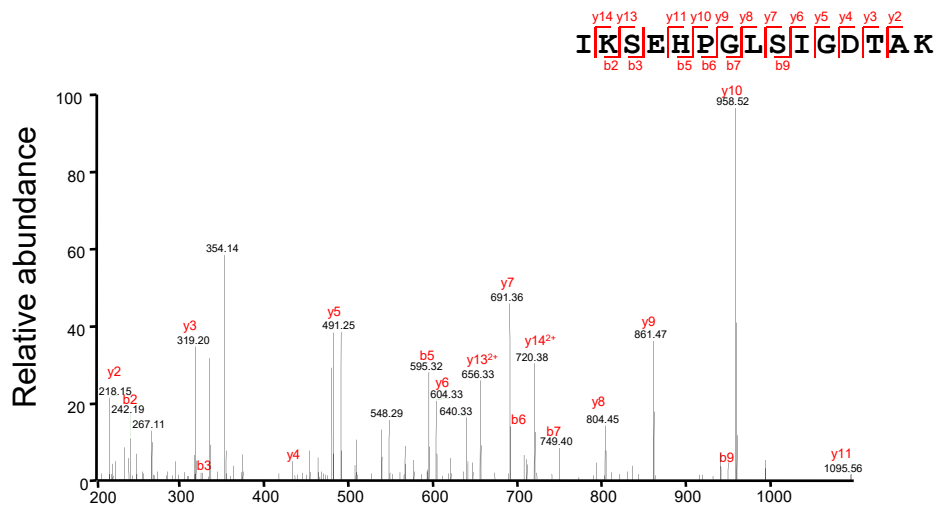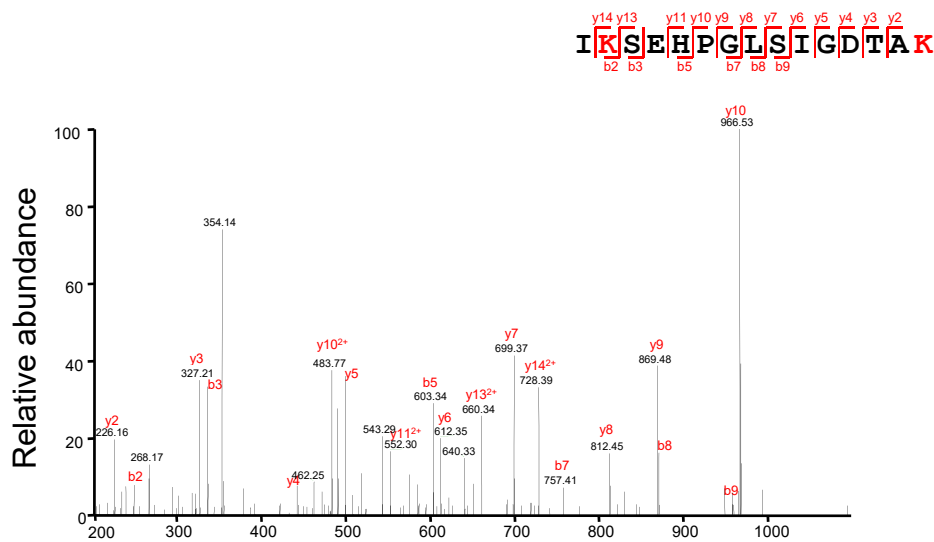

# Supplementary Figure S11

**A**

Up-regulated proteins in chromatin fractionation from SETD2 KO

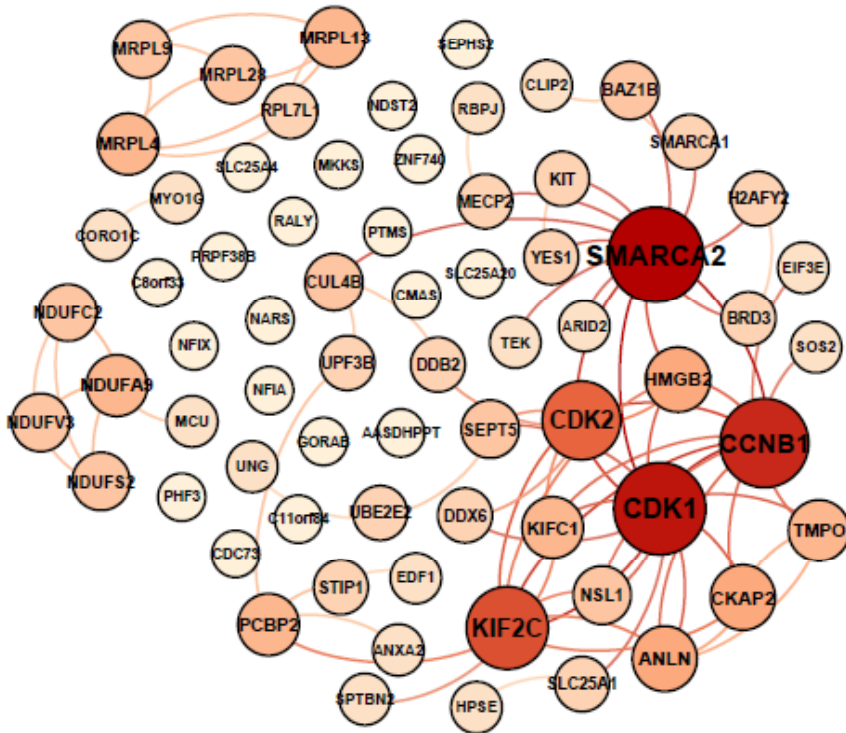

**B**

Pearson R=0.6818

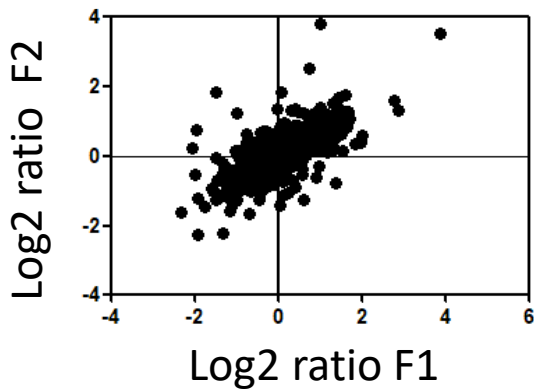

**C**

Pearson R=0.6271

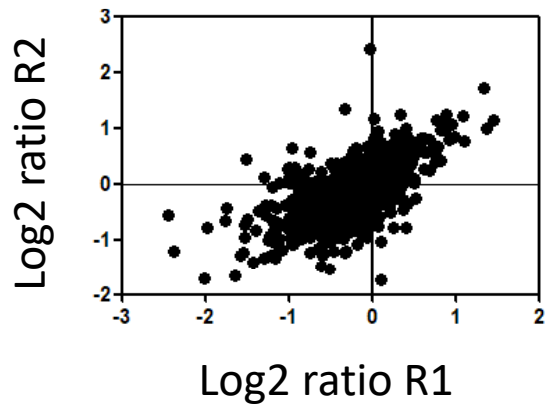

**D**

Pearson R=0.4172

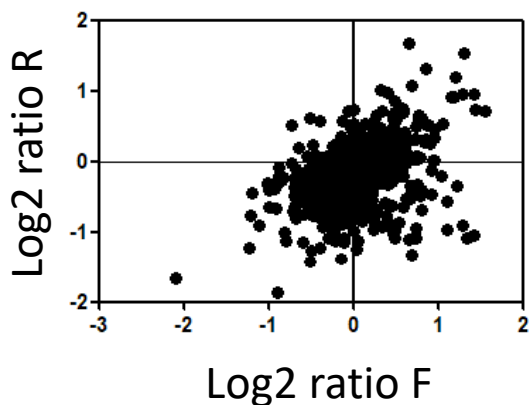

**E**

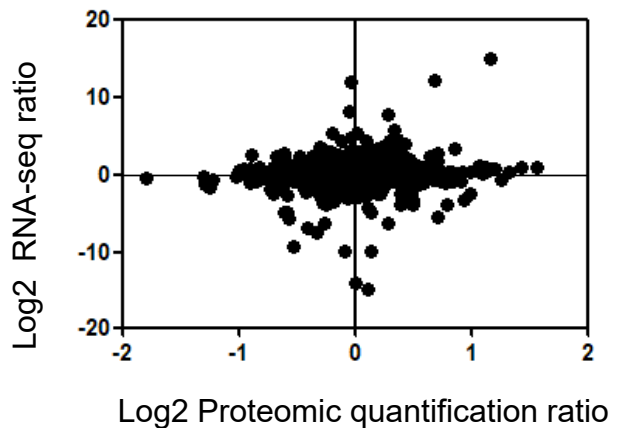

# Supplementary Figure S12

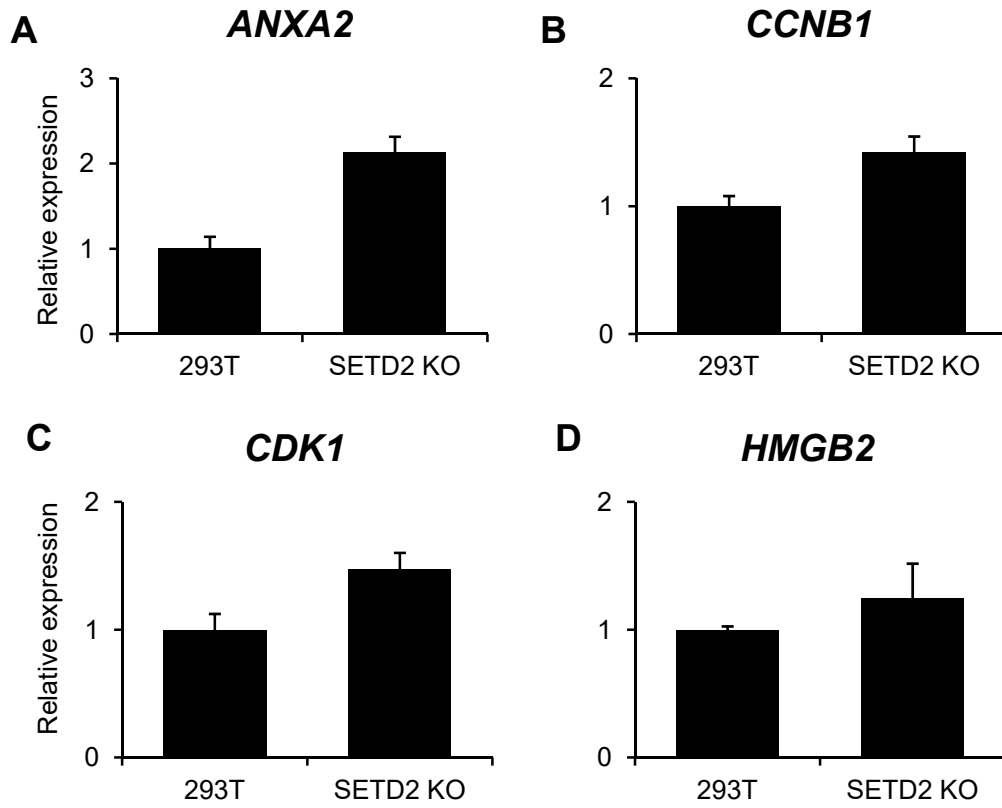

**E**

| Name  | F1   | F2   | 1/R1 | 1/R2 | Average ratio<br>Mean±SD |
|-------|------|------|------|------|--------------------------|
| CDK1  | 1.98 | 1.80 | 2.26 | 2.27 | 2.08 ± 0.23              |
| CDK2  | 1.54 | 1.74 | 2.72 | 3.15 | 2.29 ± 0.77              |
| CCNB1 | 2.58 | 1.99 | 2.02 | 2.59 | 2.30 ± 0.34              |
| ANXA2 | 2.53 | 3.27 | 2.61 | 2.31 | 2.68 ± 0.41              |
| HMGB2 | 1.73 | 1.59 | 2.55 | 2.86 | 2.18 ± 0.62              |



# Supplementary Figure S13

A

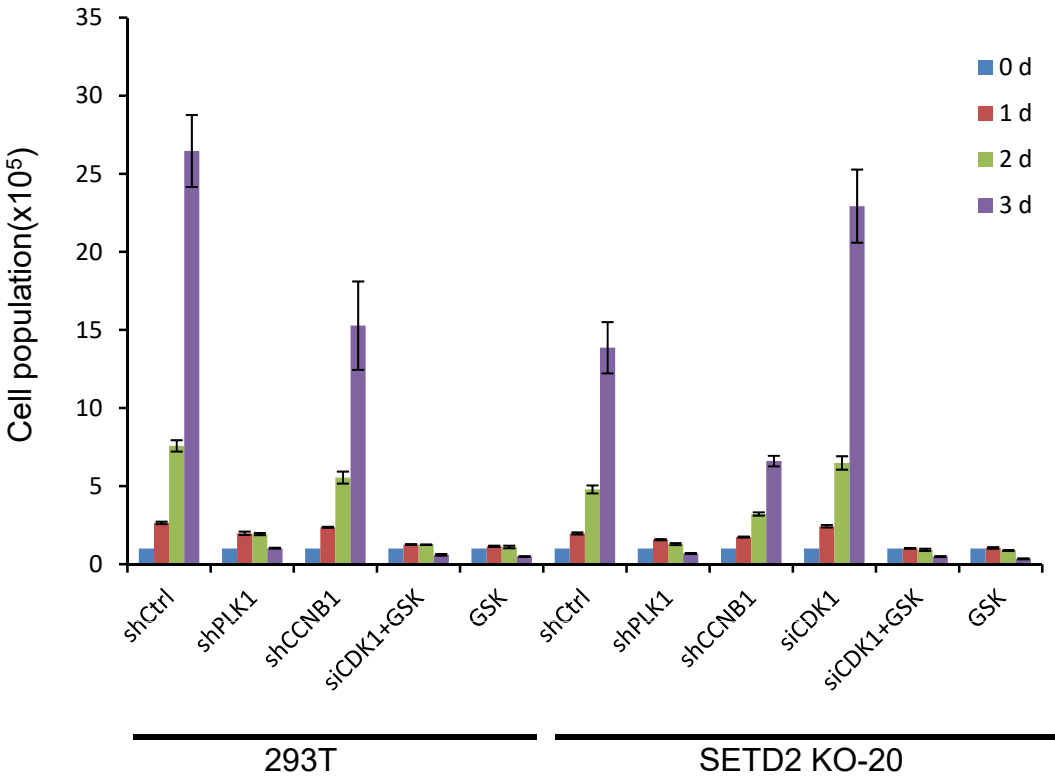

# Supplementary Figure S14

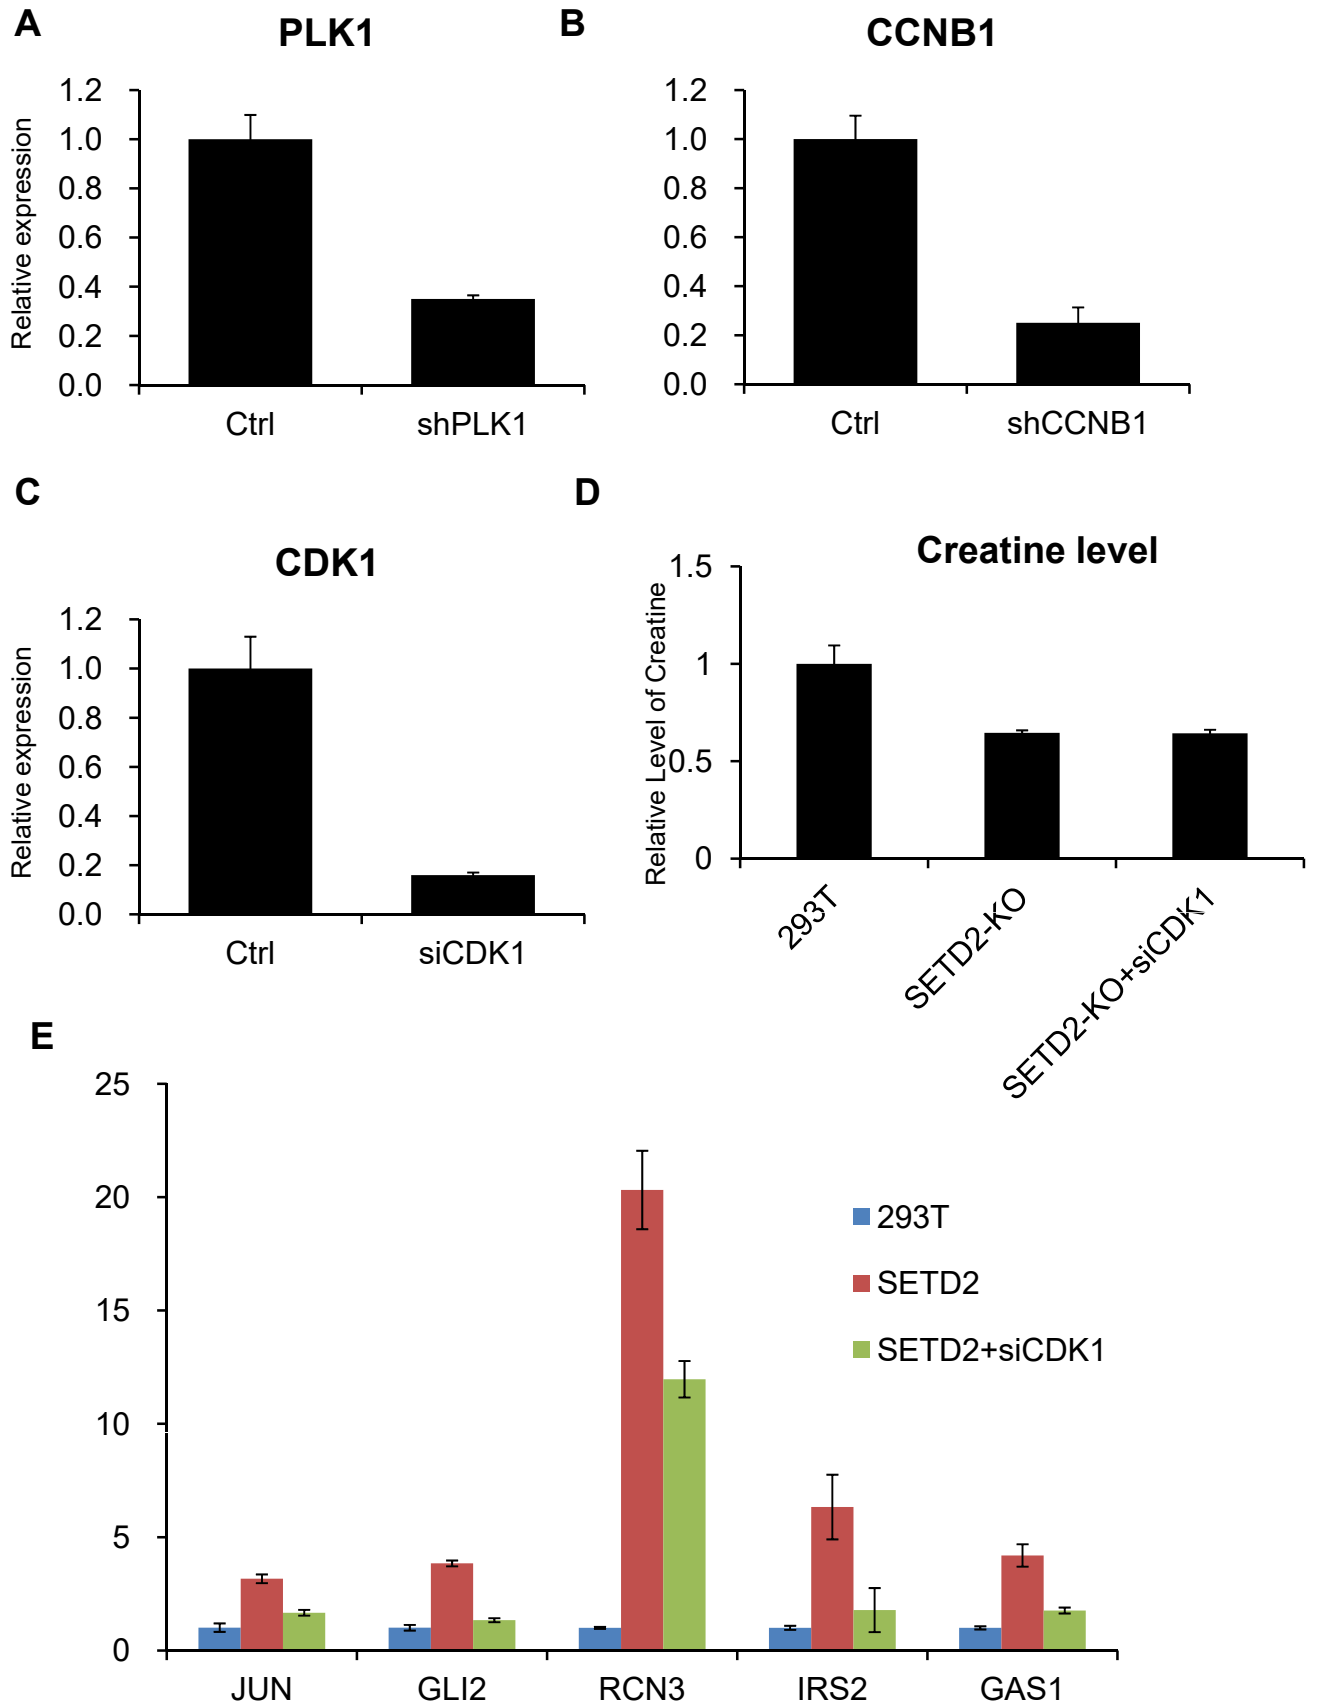

# Supplementary Figure S15

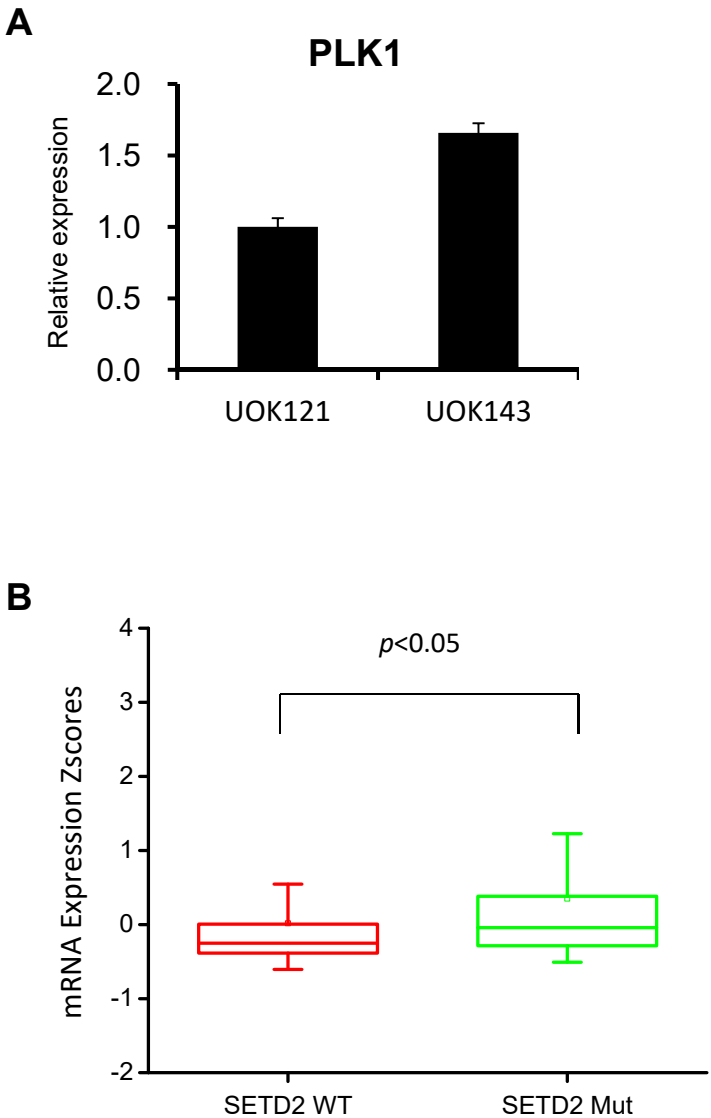

Supplement: 139216_1_supp_234919_p36437.pdf [file 139216_1_supp_234919_p36437.pdf]
